# Supplementary material for: Triazolium based ionic liquid crystals: effect of asymmetric substitution
Source: Royal Society of Chemistry journal article supplement (doi:10.1039/c4ra14961k), 2015-01-01
Supplement: c4ra14961k1.pdf [file c4ra14961k1.pdf]

## Electronic Supporting Information

K. Stappert and A.-V. Mudring,

*Triazolium Based Ionic Liquid Crystals: Effect of Asymmetric Substitution*

### Small angle X-ray scattering and Powder XRD

| Nr. | 1                      | 2                      | 3                      | 4                   | 5                   | 6                   | 7                   | 8                   | 9                   | 10                  |
|-----|------------------------|------------------------|------------------------|---------------------|---------------------|---------------------|---------------------|---------------------|---------------------|---------------------|
|     | $[C_{12}C_{14}Tr][Br]$ | $[C_{12}C_{12}Tr][Br]$ | $[C_{12}C_{10}Tr][Br]$ | $[C_{12}C_8Tr][Br]$ | $[C_{12}C_7Tr][Br]$ | $[C_{12}C_6Tr][Br]$ | $[C_{12}C_5Tr][Br]$ | $[C_{12}C_4Tr][Br]$ | $[C_{12}C_2Tr][Br]$ | $[C_{12}C_1Tr][Br]$ |
| n   | 14                     | 12                     | 10                     | 8                   | 7                   | 6                   | 5                   | 4                   | 2                   | 1                   |

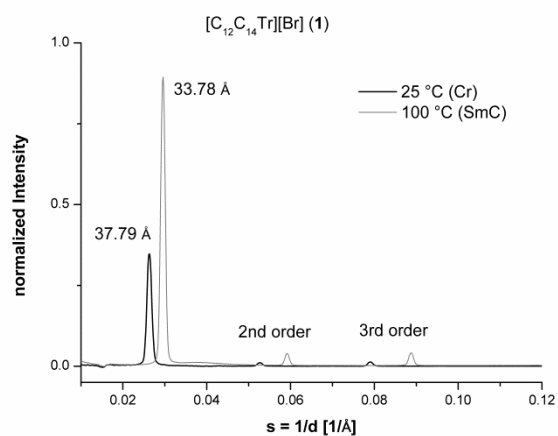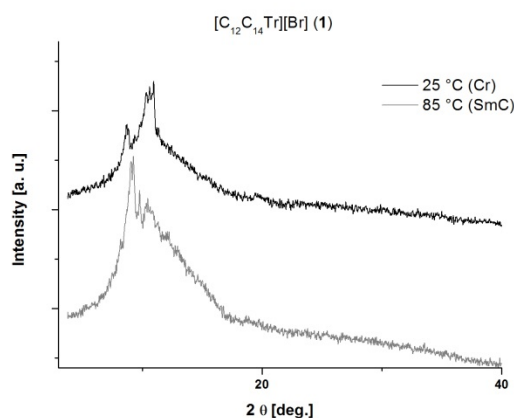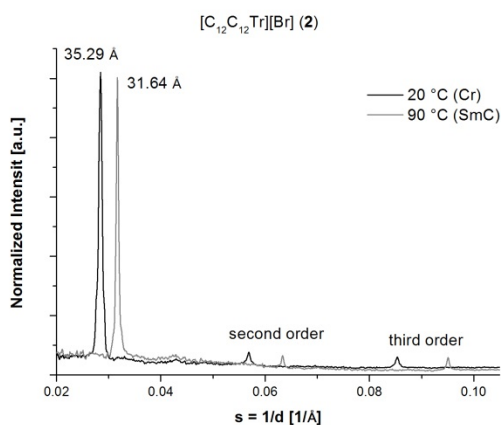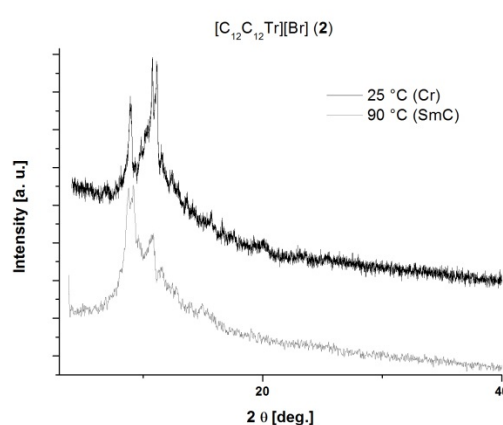

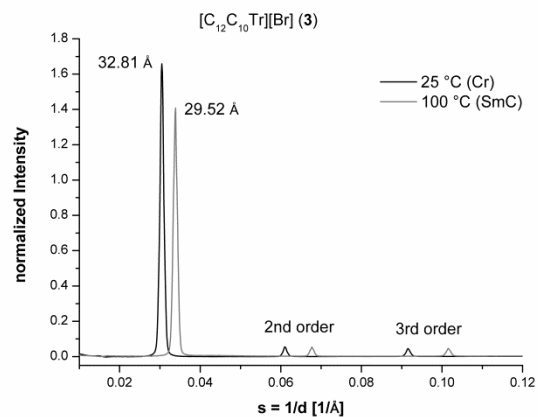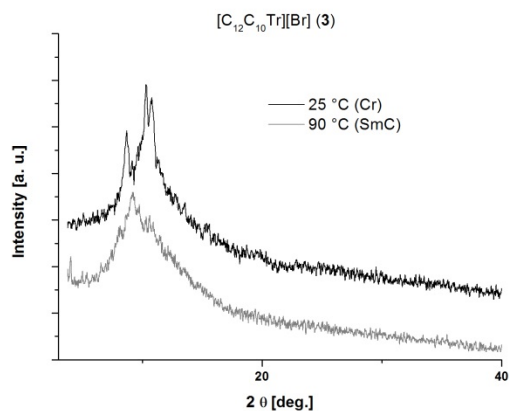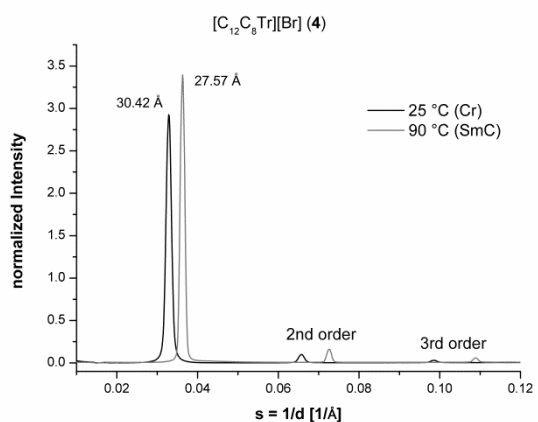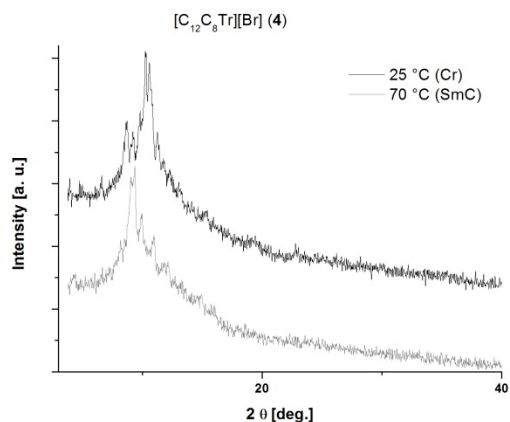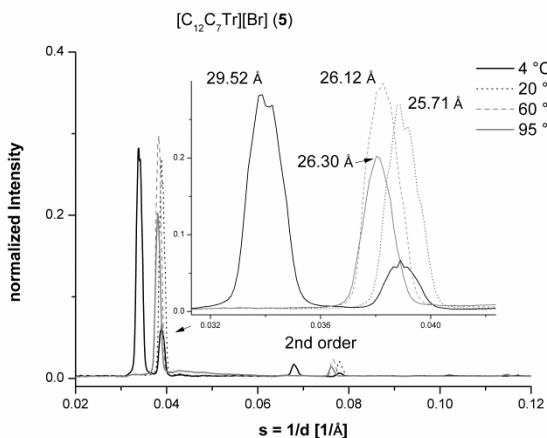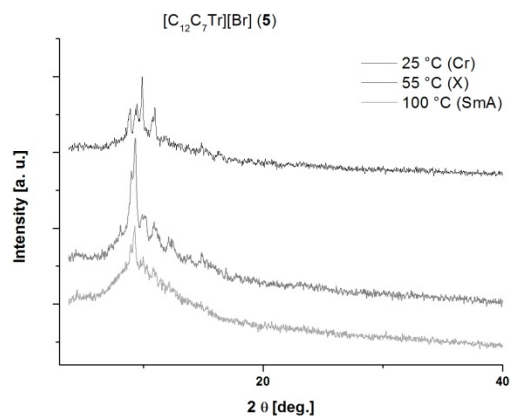

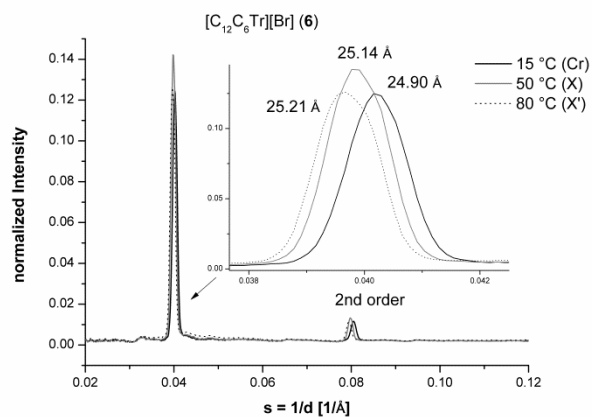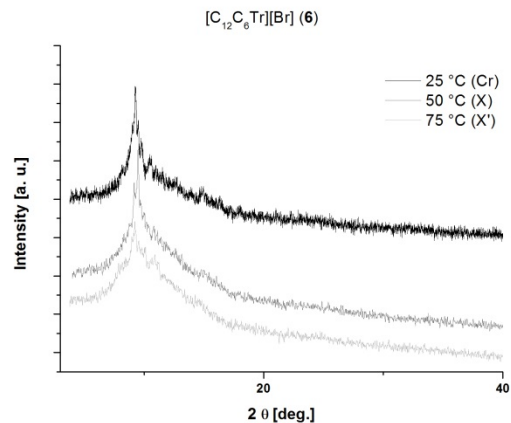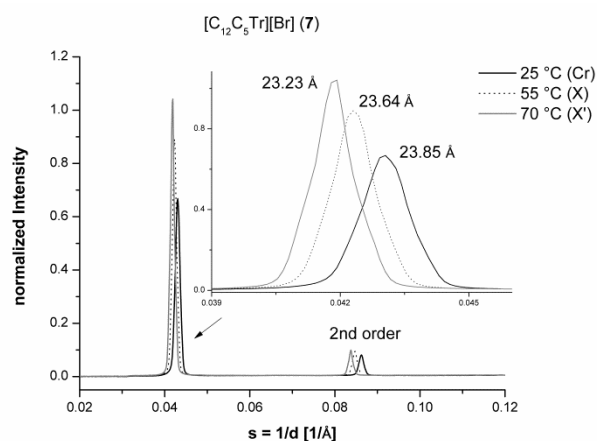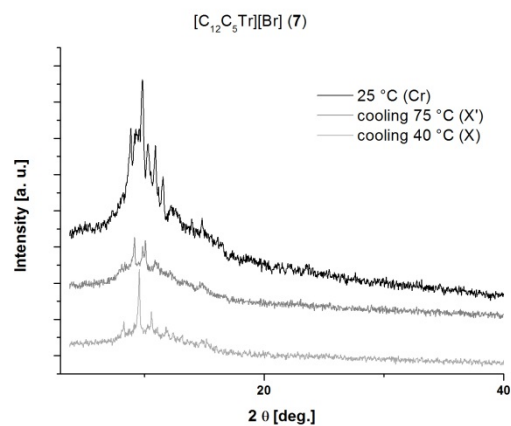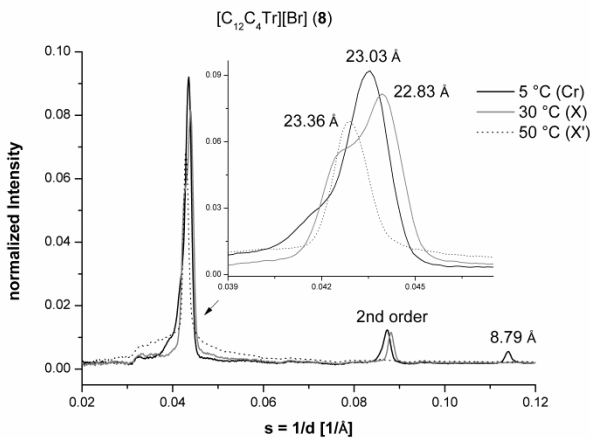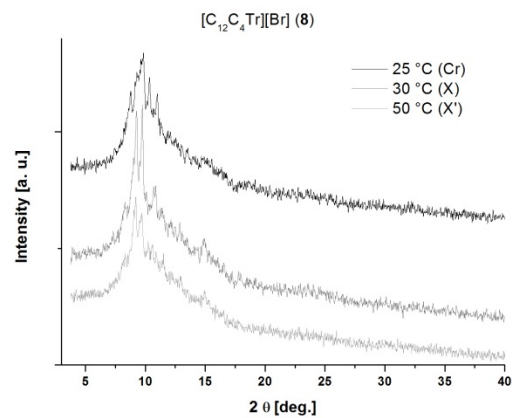

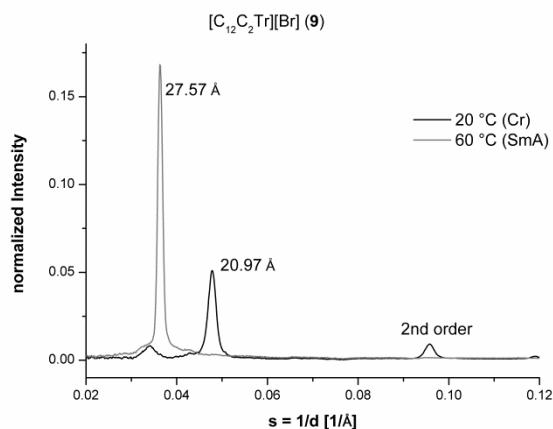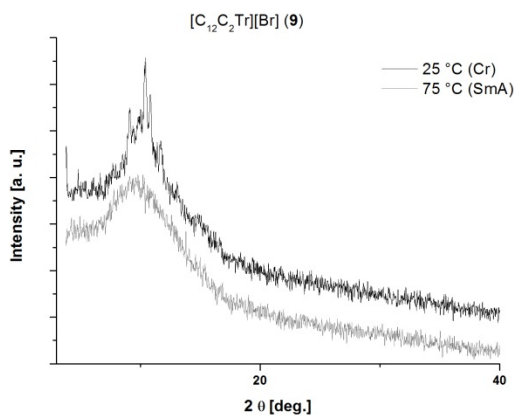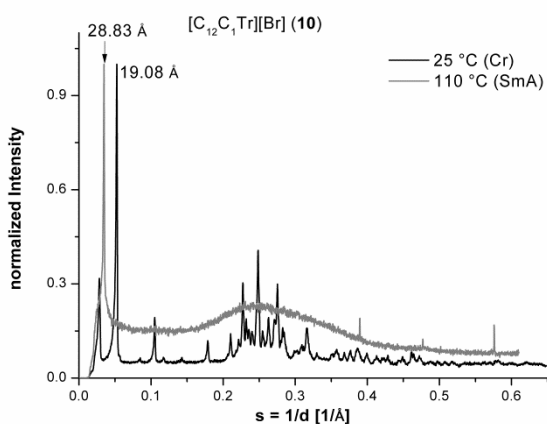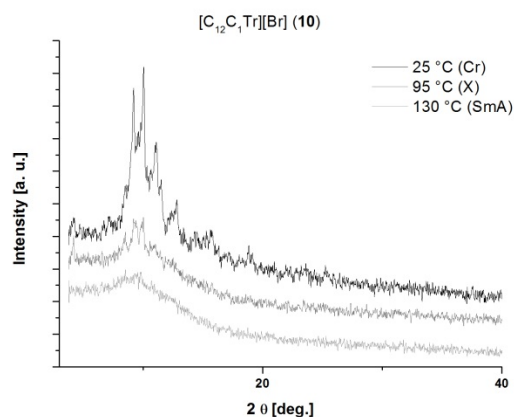

SAXS measurements for compounds **1-9** were carried out at BW4 Beamline of DORIS III, Hasylab (DESY, Hamburg, Germany) at a fixed wavelength of  $1.38 \text{ \AA}$ . Compound **10** was measured at D8 Discover (Bruker) with molybdenum source ( $\lambda = 0.71073 \text{ \AA}$ ).

Wide angle powder XRD measurements were carried out at a HUBER G670 diffractometer with molybdenum source.
